# Supplementary material for: Geometrical instability in the imbibition of a sphere
Source: Royal Society of Chemistry journal article supplement (doi:10.1039/c6sm01432a), 2016-01-01
Supplement: c6sm01432a1.pdf [file c6sm01432a1.pdf]

# Geometrical instability in the imbibition of a sphere

## Supplementary Information

A. Debacker<sup>1,2</sup>, D. Lootens<sup>2</sup> & P. Hébraud<sup>1</sup>

### 1 List of symbols

|                                                |             |                                                |
|------------------------------------------------|-------------|------------------------------------------------|
| Time                                           | $t$         |                                                |
| Radius of the aggregate                        | $R_0$       | 1 – 3.5 mm                                     |
| Length of the cylinder                         | $\ell_0$    | 7 mm                                           |
| Radius of the cylinder                         | $R_0$       | 1.5 mm                                         |
| Radius of the dry core                         | $R$         |                                                |
| Length of the dry droplet in cylinder geometry | $\ell$      |                                                |
| Volume fraction                                | $\phi$      | 63 %                                           |
| Porosity                                       | $\epsilon$  | 0.36                                           |
| Permeability                                   | $\kappa$    | 73 nm <sup>2</sup>                             |
| Refractive index of the solvent                | $n$         | 1.48                                           |
| Viscosity of the solvent                       | $\eta$      | 0.1 Pa.s                                       |
| Atmospheric pressure                           | $P_0$       | 10 <sup>5</sup> Pa                             |
| Capillary pressure                             | $P_c$       | 4.5 · 10 <sup>5</sup> Pa                       |
| Initial pressure in the aggregate              | $P_{in}$    | 10 mbar - 1 bar                                |
| Nondimensional radius                          | $\tilde{R}$ | $\frac{R}{R_0}$                                |
| Nondimensional time                            | $\tilde{t}$ | $\frac{\kappa(P_0+P_c)}{\eta\epsilon R_0^2} t$ |
| Nondimensional pressure                        | $\Pi$       | $\frac{P_{in}}{P_0+P_c}$                       |

### 2 Kinetics of imbibition : theoretical description

#### 2.1 Imbibition of a sphere

The air pressure inside the aggregate increases according to the Boyle-Mariotte law :

$$P_{in}R_0^3 = P_{in}R^3 \quad (1)$$

where  $P_{in}$  is the initial air pressure,  $R_0$  the radius of the aggregate and  $R$  the radius at time  $t$ . By equating the charge loss with the difference of pressure, we get :

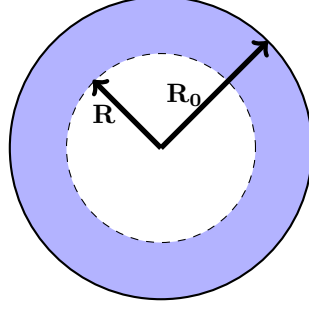

Figure 1: Imbibition of a sphere. The wetting fluid (blue) imbibes a sphere of porous material. The air (white) is entrapped at the center of the sphere.

$$P_0 + \frac{\eta \epsilon R_0^2}{\kappa} \frac{d \frac{R}{R_0}}{dt} \left( \frac{R}{R_0} - \frac{R^2}{R_0^2} \right) + P_c = P_{in} \frac{R_0^3}{R^3} \quad (2)$$

where  $\eta$  is the viscosity of the solvent,  $\epsilon$  the porosity of the medium and  $\kappa$  its permeability. It can be normalized as :

$$\frac{d\tilde{R}}{d\tilde{t}} (\tilde{R} - \tilde{R}^2) + 1 = \frac{P_{in}}{P_0 + P_c} \frac{1}{\tilde{R}^3} \quad (3)$$

using the dimensionless quantities :

$$\tilde{R} = \frac{R}{R_0} \quad \tilde{t} = \frac{\kappa(P_0 + P_c)}{\eta \epsilon R_0^2} t \quad (4)$$

A stationary state at long time is obtained :

$$\tilde{R}_{plateau} = \Pi^{1/3} \quad (5)$$

where  $\Pi$  is defined as  $\frac{P_{in}}{P_0 + P_c}$ . The solution is given by :

$$\begin{aligned} \tilde{t} = & \frac{1}{6} - \frac{\tilde{R}^2}{2} + \frac{\tilde{R}^3}{3} + \frac{1}{6} \Pi^{2/3} \log \left( \frac{\Pi^{2/3} \tilde{R}^2 + \Pi^{1/3} \tilde{R} + 1}{\Pi^{2/3} + \Pi^{1/3} + 1} \right) \\ & - \frac{1}{\sqrt{3}} \Pi^{2/3} \left( \arctan \left( \frac{2\Pi^{1/3} \tilde{R} + 1}{\sqrt{3}} \right) - \arctan \left( \frac{2\Pi^{1/3} + 1}{\sqrt{3}} \right) \right) \\ & - \frac{1}{3} \Pi^{2/3} \log \left( \frac{\Pi^{1/3} \tilde{R} - 1}{\Pi^{1/3} - 1} \right) + \frac{1}{3} \Pi \log \left( \frac{\Pi \tilde{R}^3 - 1}{\Pi - 1} \right) \end{aligned} \quad (6)$$

This equation has been used to model the evolution of the imbibed radius as a function of time (Fig. 1 of the MS).

The front acceleration is then obtained by derivation of Eq. 4 :

$$\frac{d^2 \tilde{R}}{dt^2} = \frac{1}{(\tilde{R}^2 - \tilde{R})^3} \left( 1 - \frac{\Pi}{\tilde{R}^3} \right) \left( -\frac{4\Pi}{\tilde{R}^3} + \frac{5\Pi}{\tilde{R}^2} + 1 - 2\tilde{R} \right) \quad (7)$$

and is plotted in Fig. 2 of the Letter. The first two terms of the product are negative. The sign of the acceleration is thus governed by the last term, and a straightforward analysis shows that the acceleration is positive for a range of  $\tilde{R}$  when :

$$\Pi < 4/625 = 6.4 \cdot 10^{-3} \quad (8)$$

## 2.2 Imbibition kinetics of an infinite cylinder aggregate

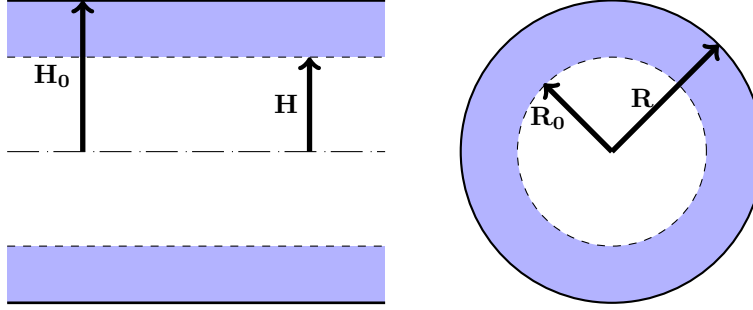

Figure 2: Imbibition of an infinite cylinder. The wetting fluid (blue) imbibes a cylinder of porous material. The air (white) is entrapped at the center of the cylinder.

Let us now consider an infinite cylinder geometry.

$$P_0 + \frac{\eta\epsilon}{\kappa} \frac{dR}{dt} R \log\left(\frac{R}{R_0}\right) + P_c = P_{in} \frac{R_0^2}{R^2} \quad (9)$$

or, with the dimensionless quantities defined in Eq. 4 :

$$\frac{d\tilde{R}}{d\tilde{t}} \tilde{R} \log \tilde{R} + 1 = \frac{\Pi}{\tilde{R}^2} \quad (10)$$

The acceleration of the front is then given by :

$$\frac{d^2 \tilde{R}}{d\tilde{t}^2} = \frac{\left(\Pi \tilde{R}^{-2} - 1\right) \left(3\Pi \tilde{R}^{-2} \log(\tilde{R}) + \Pi \tilde{R}^{-2} - 1 - \log(\tilde{R})\right)}{(\tilde{R} \log(\tilde{R}))^3} \quad (11)$$

The front accelerates over a range of  $\tilde{R}$  values when :

$$\Pi < \frac{e^{-8/3}}{9} = 5.5 \cdot 10^{-3} \quad (12)$$

## 3 Planar geometry

The pressure balance now becomes :

$$P_0 + \frac{\eta\epsilon}{\kappa} \frac{dH}{dt} (H_0 - H) + P_c = P_{in} \frac{H_0}{H} \quad (13)$$

Defining  $\tilde{H} = \frac{H}{H_0}$  it may be written in dimensionless units :

$$\frac{d\tilde{H}}{d\tilde{t}} (1 - \tilde{H}) + 1 = \frac{\Pi}{\tilde{H}} \quad (14)$$

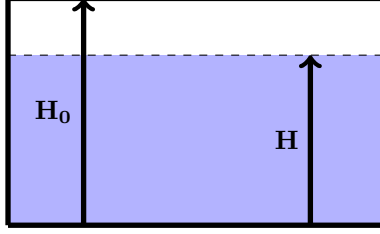

Figure 3: Imbibition of a planar geometry. The wetting fluid (blue) imbibes a plane of porous material. The air (white) is entrapped above the fluid.

and the second derivative writes :

$$\frac{d^2 \tilde{H}}{d\tilde{t}^2} = \frac{\left(\Pi \tilde{R}^{-1} - 1\right) \left(-\Pi \tilde{H}^{-2} + 2\Pi \tilde{H}^{-1} - 1\right)}{(1 - \tilde{H})^3} \quad (15)$$

The sign of  $\frac{d^2 \tilde{H}}{d\tilde{t}^2}$  remains constant for  $\tilde{H} \in [0, 1]$  and the front never accelerates.
